# Supplementary material for: Study of forced degradation behaviour of cobicistat and atazanavir using LC/ESI/QTOF/MS; a combination of in-sourced and collision-induced dissociation for evaluation of the fragmentation patterns of degradation products
Source: Royal Society of Chemistry journal article supplement (doi:10.1039/c8nj03418d), 2018-01-01
Supplement: c8nj03418d1.pdf [file c8nj03418d1.pdf]

## Study of forced degradation behaviour of cobicistat and atazanavir using LC/ESI/QTOF/MS; Combination of in-source and collision induced dissociation for evaluate the fragmentation patterns of degradation products

### Supplementary Data

- Fig. S1** UV spectra of cobicistat and atazanavir
- Fig. S2** UPLC/PDA chromatograms of trials were performed to separate the critical pair ATZ
- Fig. S3** LC/MS/MS spectra (Count (%) vs. mass-to-charge ( $m/z$ )) of the  $[M+H]^+$  ions of (a) COB, (b) C1, (c) C2, (d) C4, and (e) C7
- Fig. S4** LC/MS spectra (Count (%) vs. mass-to-charge ( $m/z$ )) of the  $[M+H]^+$  ions of (a) C3, (b) C5, (c) C6, (d) C8, and (e) C9
- Fig. S5** (a) In-source fragmentation of C3 ( $m/z$  410), (b) MS/MS spectra of  $[M+H]^+$  ion of C3, (c) MS/MS spectra of  $[M+H]^+$  ion of  $m/z$  349, (d) MS/MS spectra of  $[M+H]^+$  ion of  $m/z$  332, (e) MS/MS spectra of  $[M+H]^+$  ion of  $m/z$  252
- Fig. S6** (a) In-source fragmentation of C5 ( $m/z$  580), (b) MS/MS spectra of  $[M+H]^+$  ion of C5, (c) MS/MS spectra of  $[M+H]^+$  ion of  $m/z$  493, (d) MS/MS spectra of  $[M+H]^+$  ion of  $m/z$  393, (e) MS/MS spectra of  $[M+H]^+$  ion of  $m/z$  198
- Fig. S7** (a) In-source fragmentation of C6/C8 ( $m/z$  606), (b) MS/MS spectra of  $[M+H]^+$  ion of C6/C8, (c) MS/MS spectra of  $[M+H]^+$  ion of  $m/z$  562, (d) MS/MS spectra of  $[M+H]^+$  ion of  $m/z$  491, (e) MS/MS spectra of  $[M+H]^+$  ion of  $m/z$  448, (f) MS/MS spectra of  $[M+H]^+$  ion of  $m/z$  214
- Fig. S8** (a) In-source fragmentation of C9 ( $m/z$  792), (b) MS/MS spectra of  $[M+H]^+$  ion of C9, (c) MS/MS spectra of  $[M+H]^+$  ion of  $m/z$  689, (d) MS/MS spectra of  $[M+H]^+$  ion of  $m/z$  622, (e) MS/MS spectra of  $[M+H]^+$  ion of  $m/z$  519, (f) MS/MS spectra of  $[M+H]^+$  ion of  $m/z$  213
- Fig. S9** LC/MS/MS spectra (Count (%) vs. mass-to-charge ( $m/z$ )) of the  $[M+H]^+$  ions of (a) ATZ, (b) A1, (c) A2, and (d) A3
- Fig. S10** LC/MS/MS spectra (Count (%) vs. mass-to-charge ( $m/z$ )) of the  $[M+H]^+$  ions of (a) A4, (b) A5, and (c) A6
- Table S1** Summary of trials carried out to separate the critical pair (A2 & A3) of ATZ
- Table S2** High resolution mass spectrometry data of all fragment ions of COB and ATZ and their DPs
- Table S3** Accuracy data of UPLC method for COB and ATZ
- Table S4** Precision data of UPLC method for COB and ATZ

**Table S5** Robustness data of UPLC method for COB and ATZ

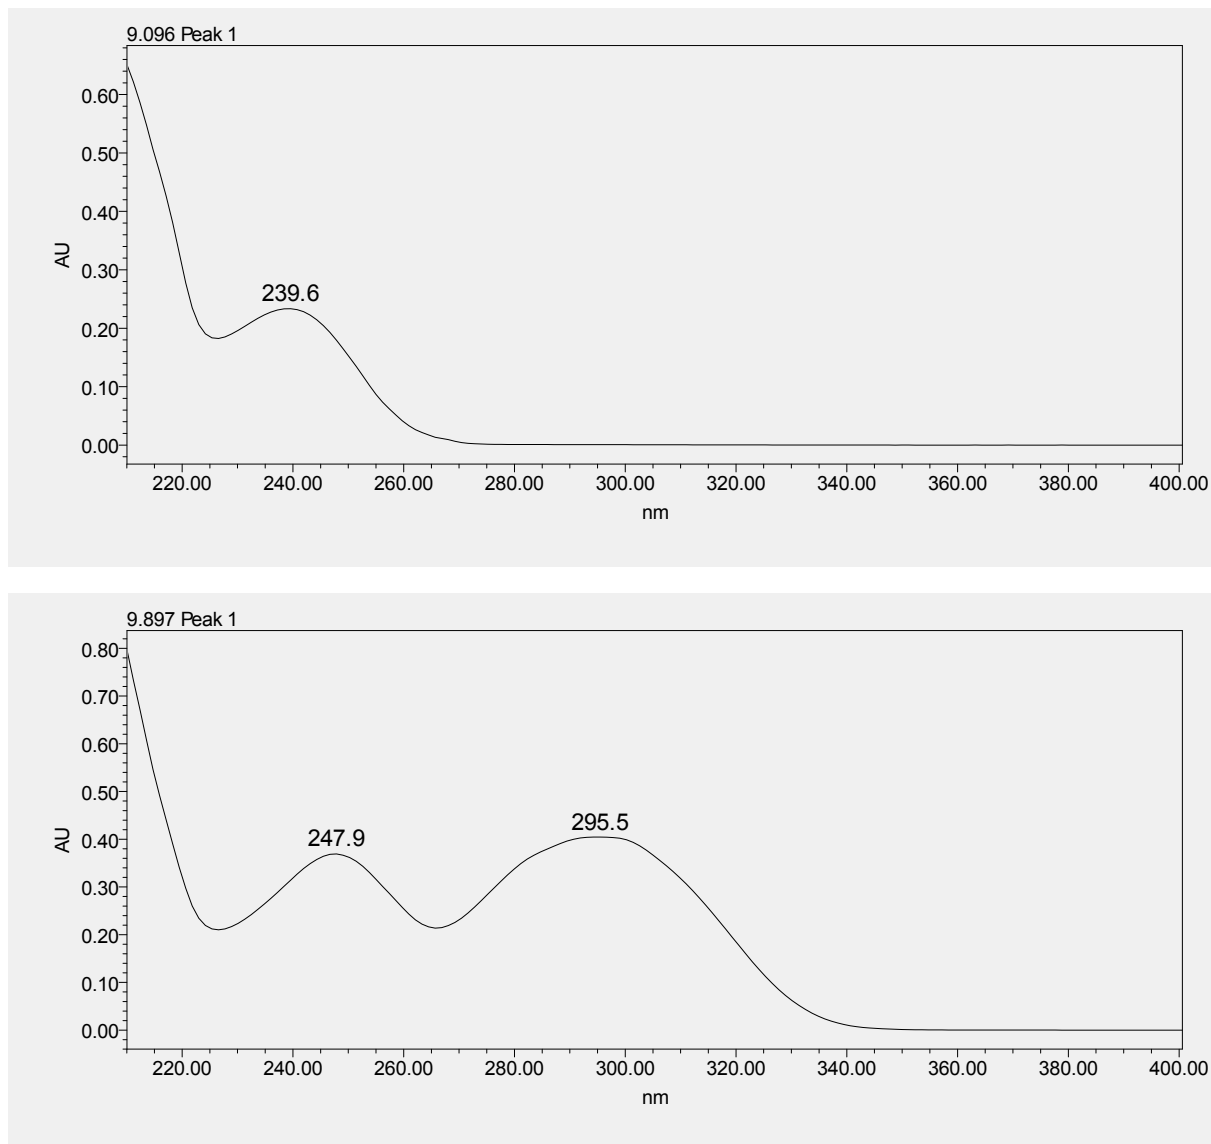

**Fig. S1** UV spectra of cobicistat and atazanavir

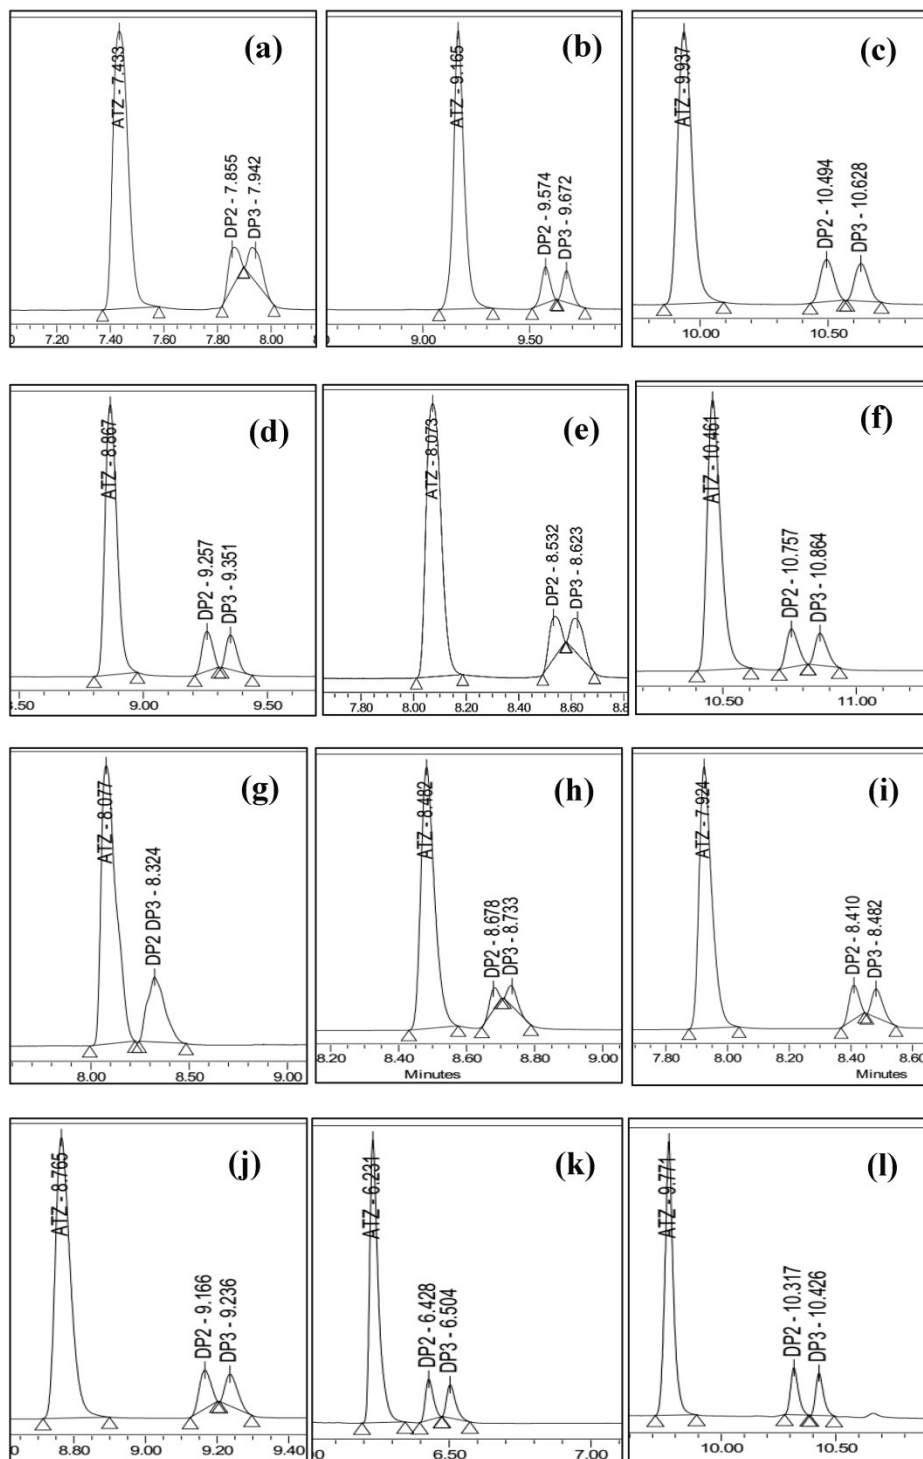

Fig. S2. UPLC/PDA chromatograms of trials were performed to separate the critical pair ATZ

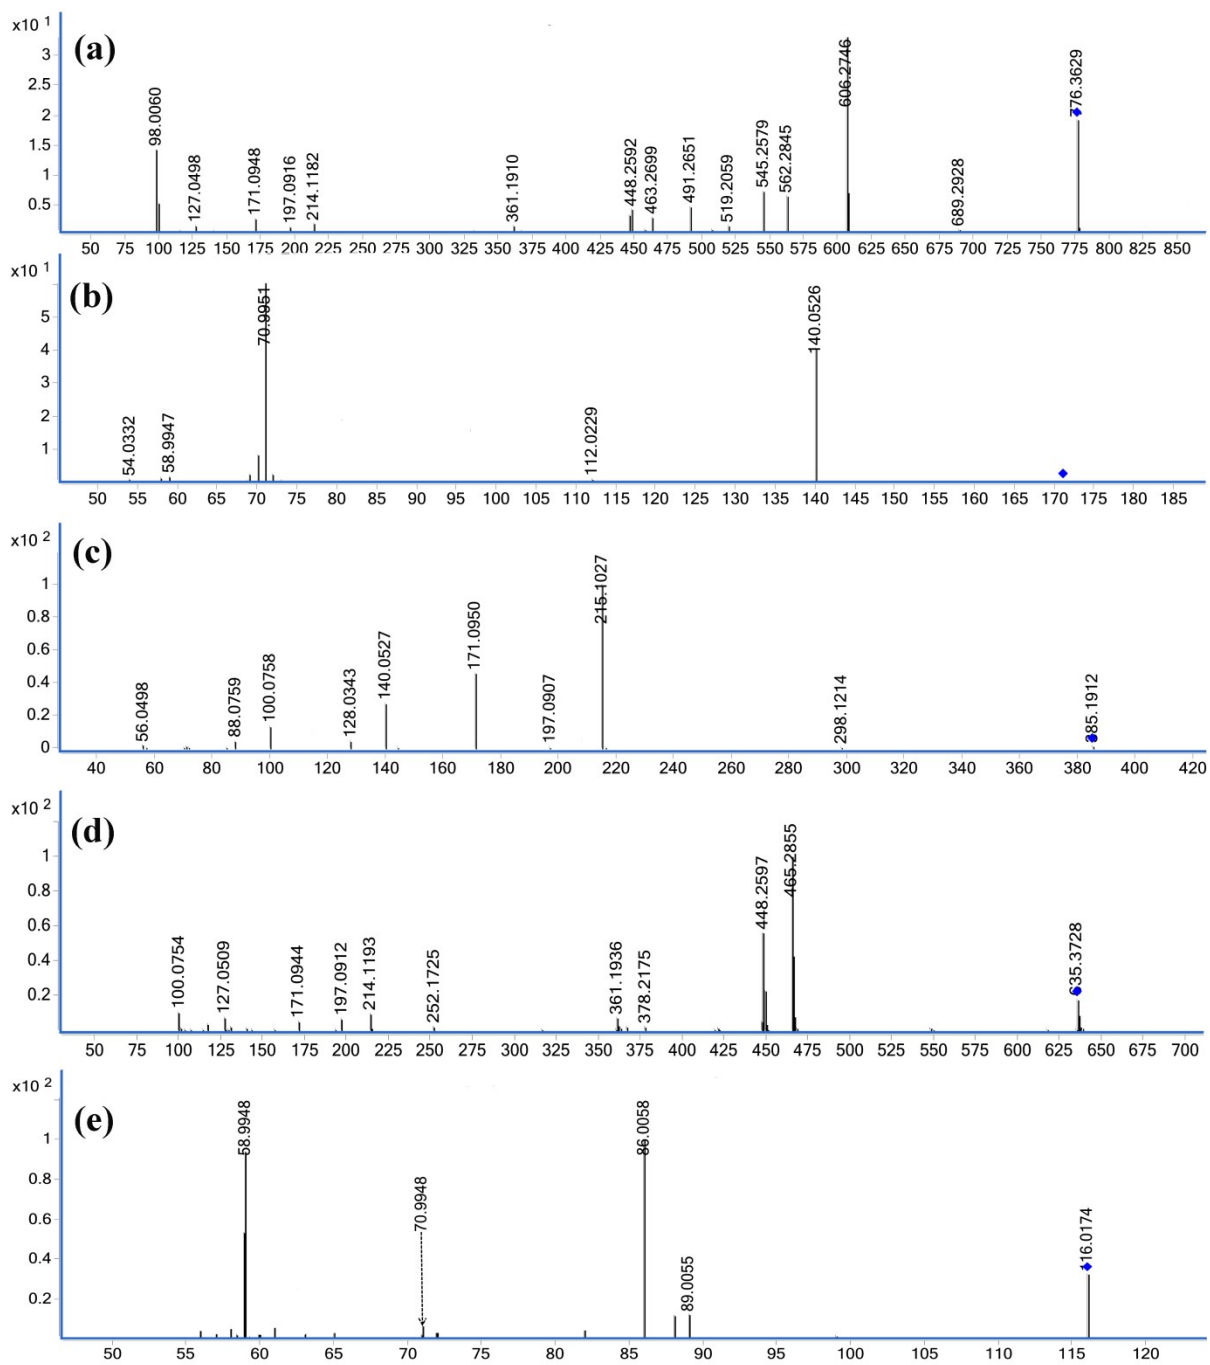

**Fig. S3.** LC/MS/MS spectra (Count (%) vs. mass-to-charge ( $m/z$ )) of the  $[M+H]^+$  ions of (a) COB, (b) C1, (c) C2, (d) C4, and (e) C7

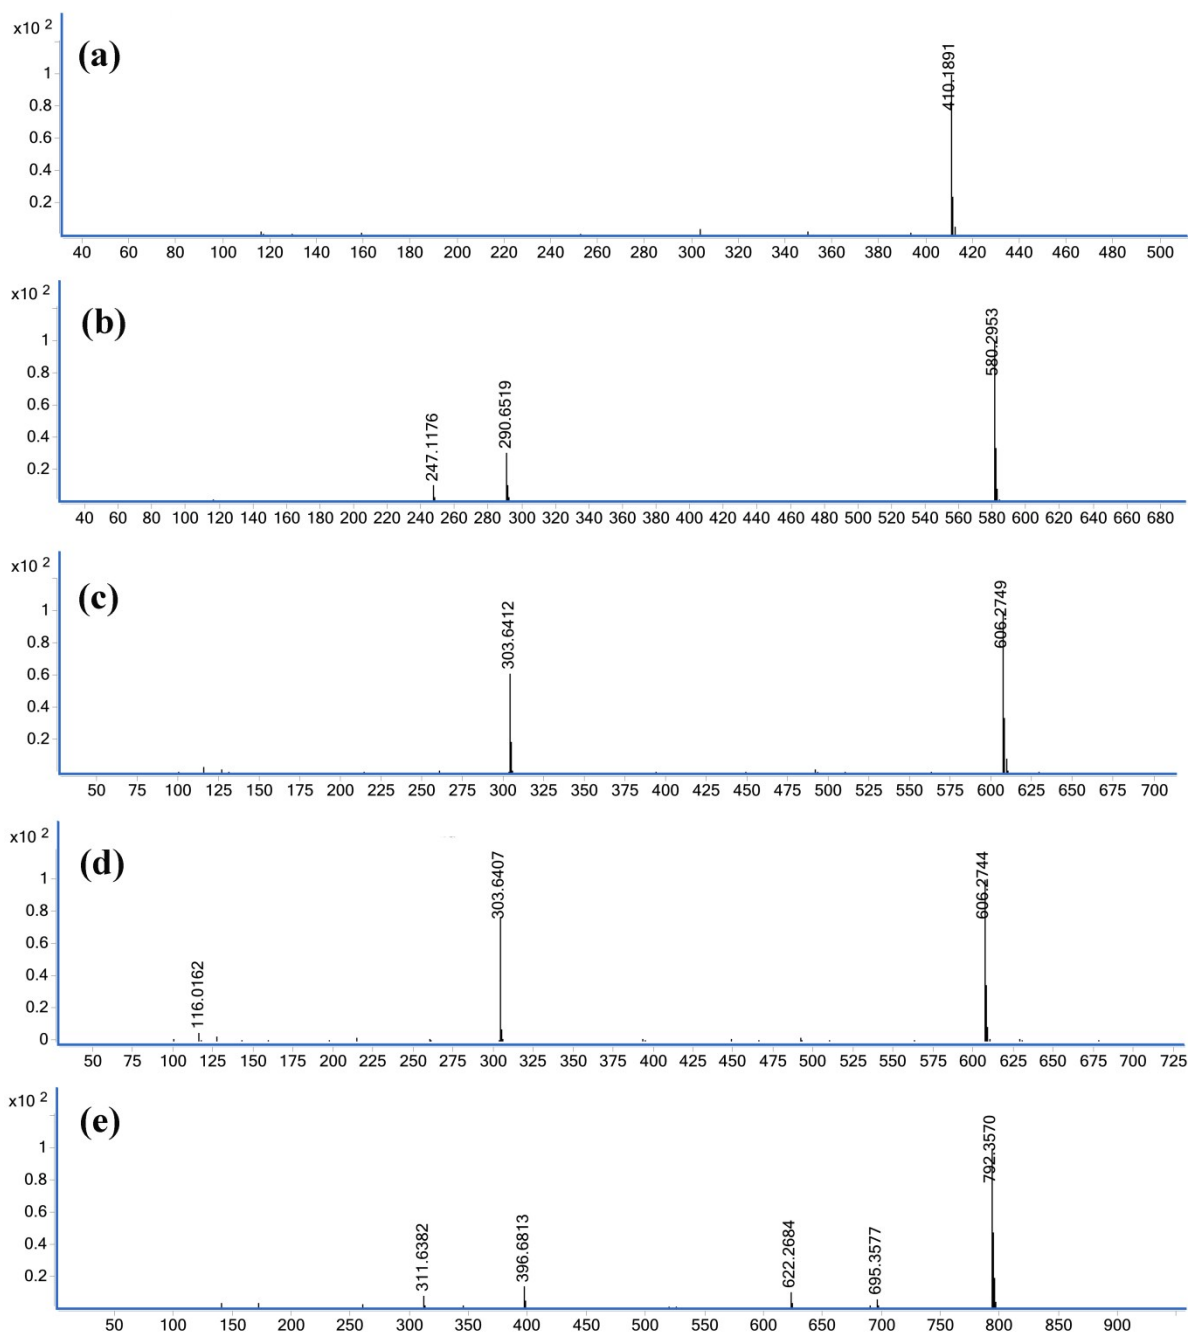

**Fig. S4.** LC/MS spectra (Count (%) vs. mass-to-charge ( $m/z$ )) of the  $[M+H]^+$  ions of (a) C3, (b) C5, (c) C6, (d) C8, and (e) C9

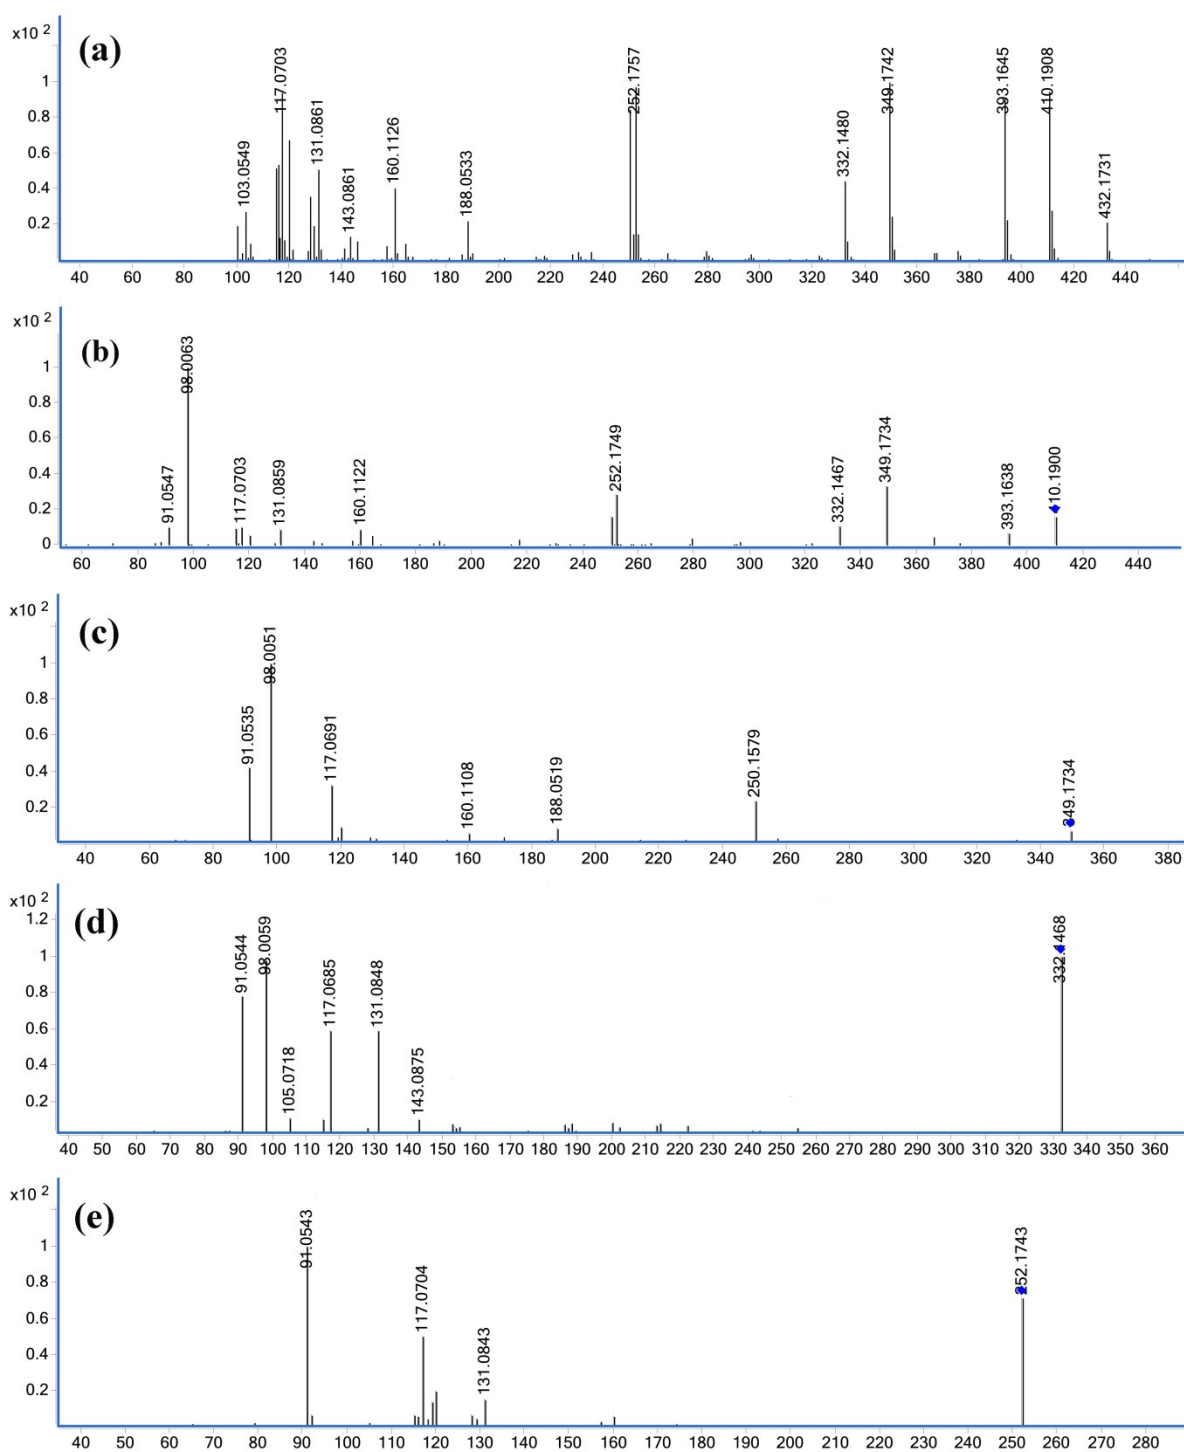

**Fig. S5.** (a) In-source fragmentation of C3 ( $m/z$  410), (b) MS/MS spectra of  $[M+H]^+$  ion of C3, (c) MS/MS spectra of  $[M+H]^+$  ion of  $m/z$  349, (d) MS/MS spectra of  $[M+H]^+$  ion of  $m/z$  332, (e) MS/MS spectra of  $[M+H]^+$  ion of  $m/z$  252

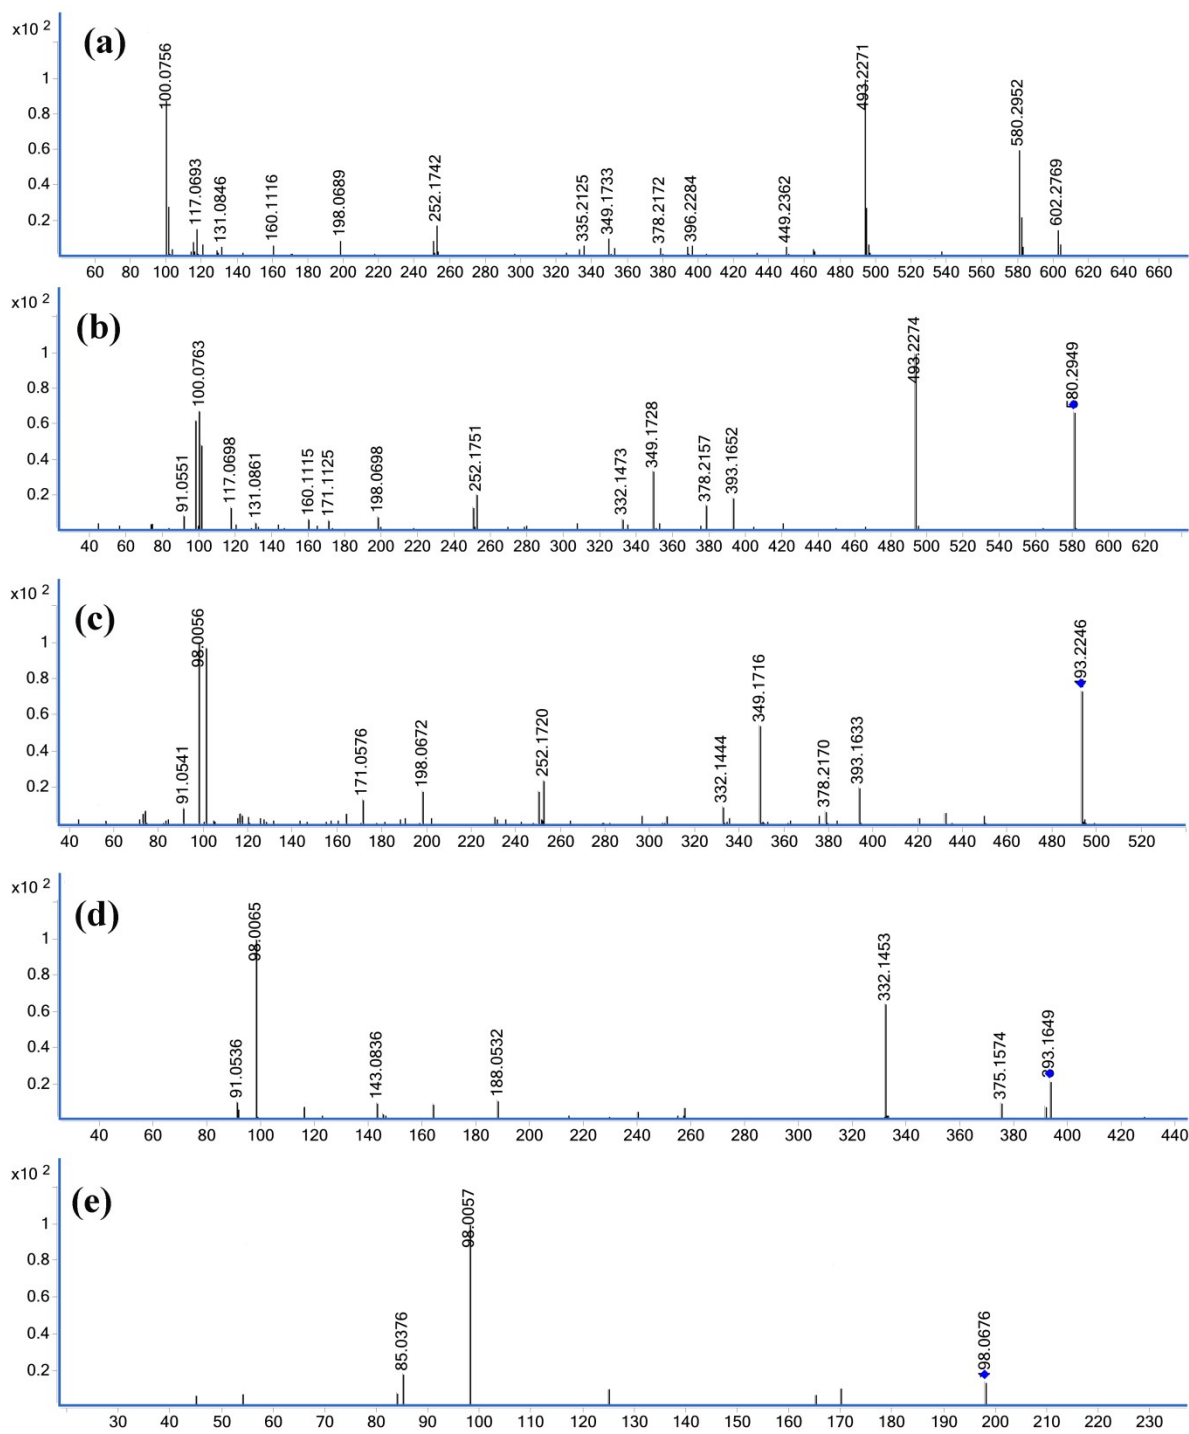

**Fig. S6.** (a) In-source fragmentation of C5 ( $m/z$  580), (b) MS/MS spectra of  $[M+H]^+$  ion of C5, (c) MS/MS spectra of  $[M+H]^+$  ion of  $m/z$  493, (d) MS/MS spectra of  $[M+H]^+$  ion of  $m/z$  393, (e) MS/MS spectra of  $[M+H]^+$  ion of  $m/z$  198

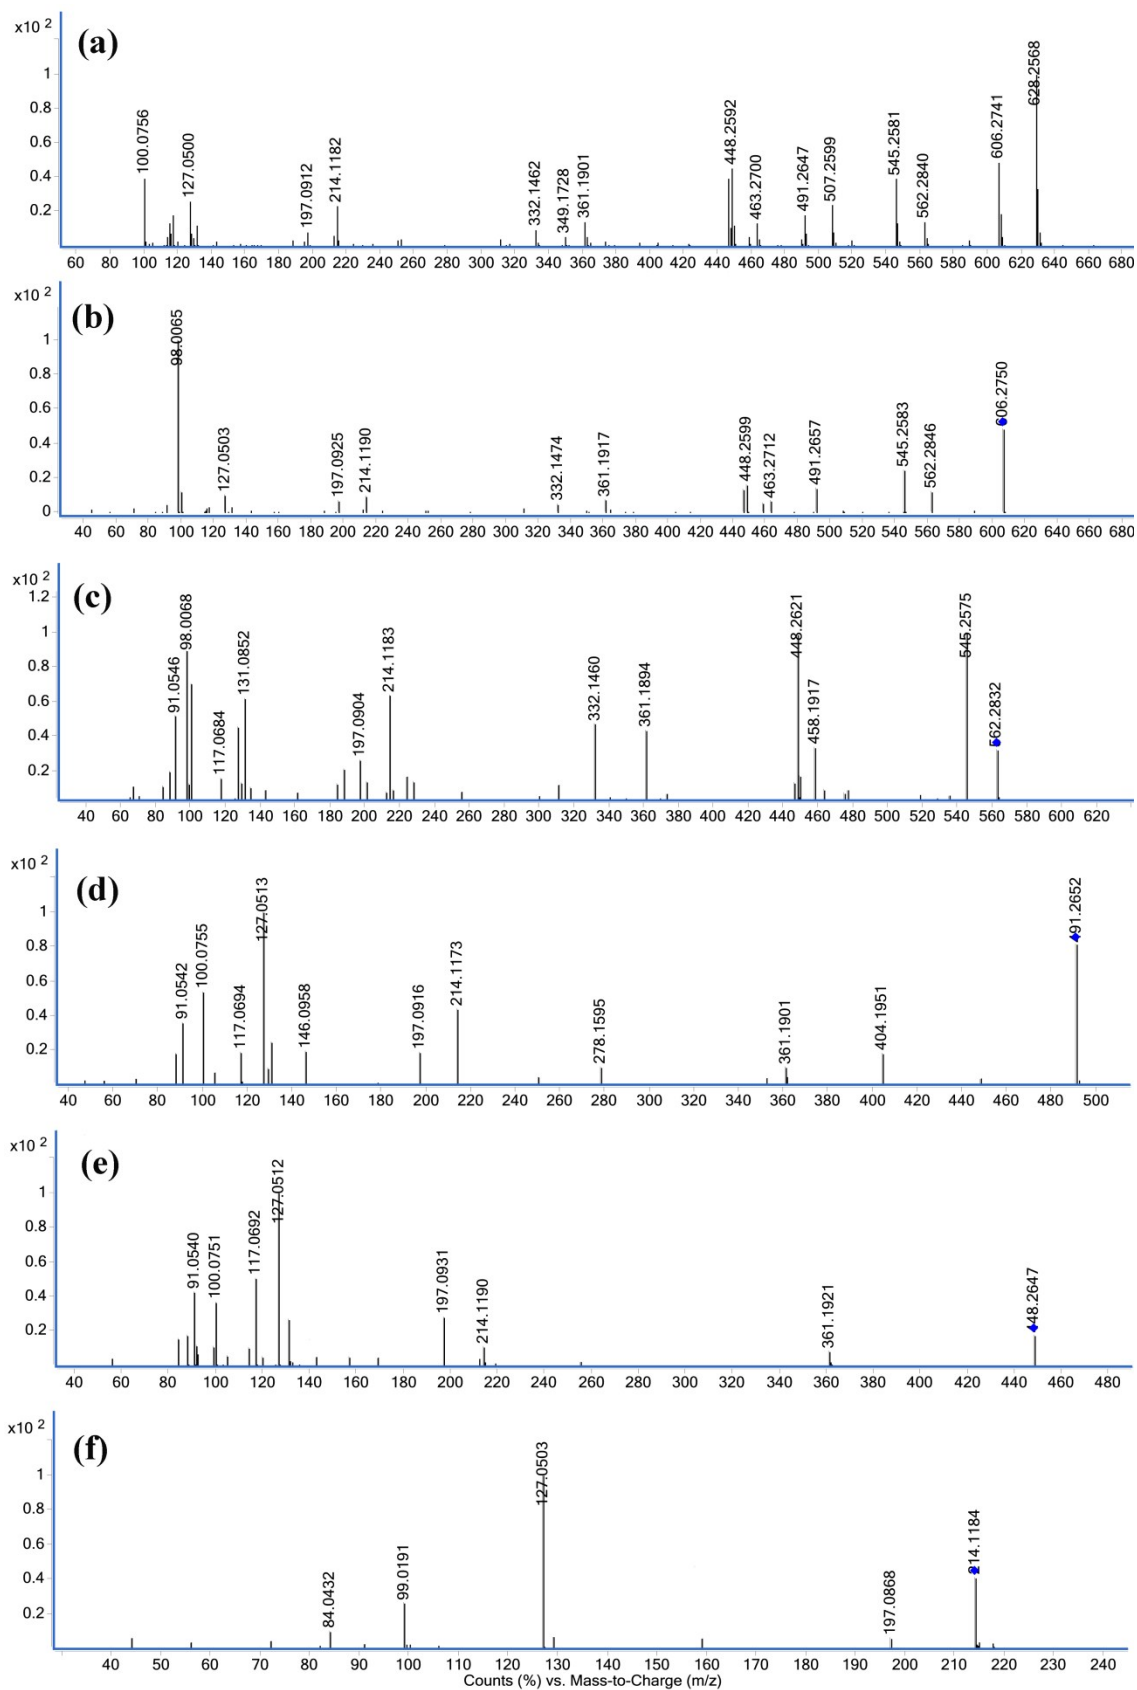

**Fig. S7.** (a) In-source fragmentation of C6/C8 ( $m/z$  606), (b) MS/MS spectra of  $[M+H]^+$  ion of C6/C8, (c) MS/MS spectra of  $[M+H]^+$  ion of  $m/z$  562, (d) MS/MS spectra of  $[M+H]^+$  ion of  $m/z$  491, (e) MS/MS spectra of  $[M+H]^+$  ion of  $m/z$  448, (f) MS/MS spectra of  $[M+H]^+$  ion of  $m/z$  214



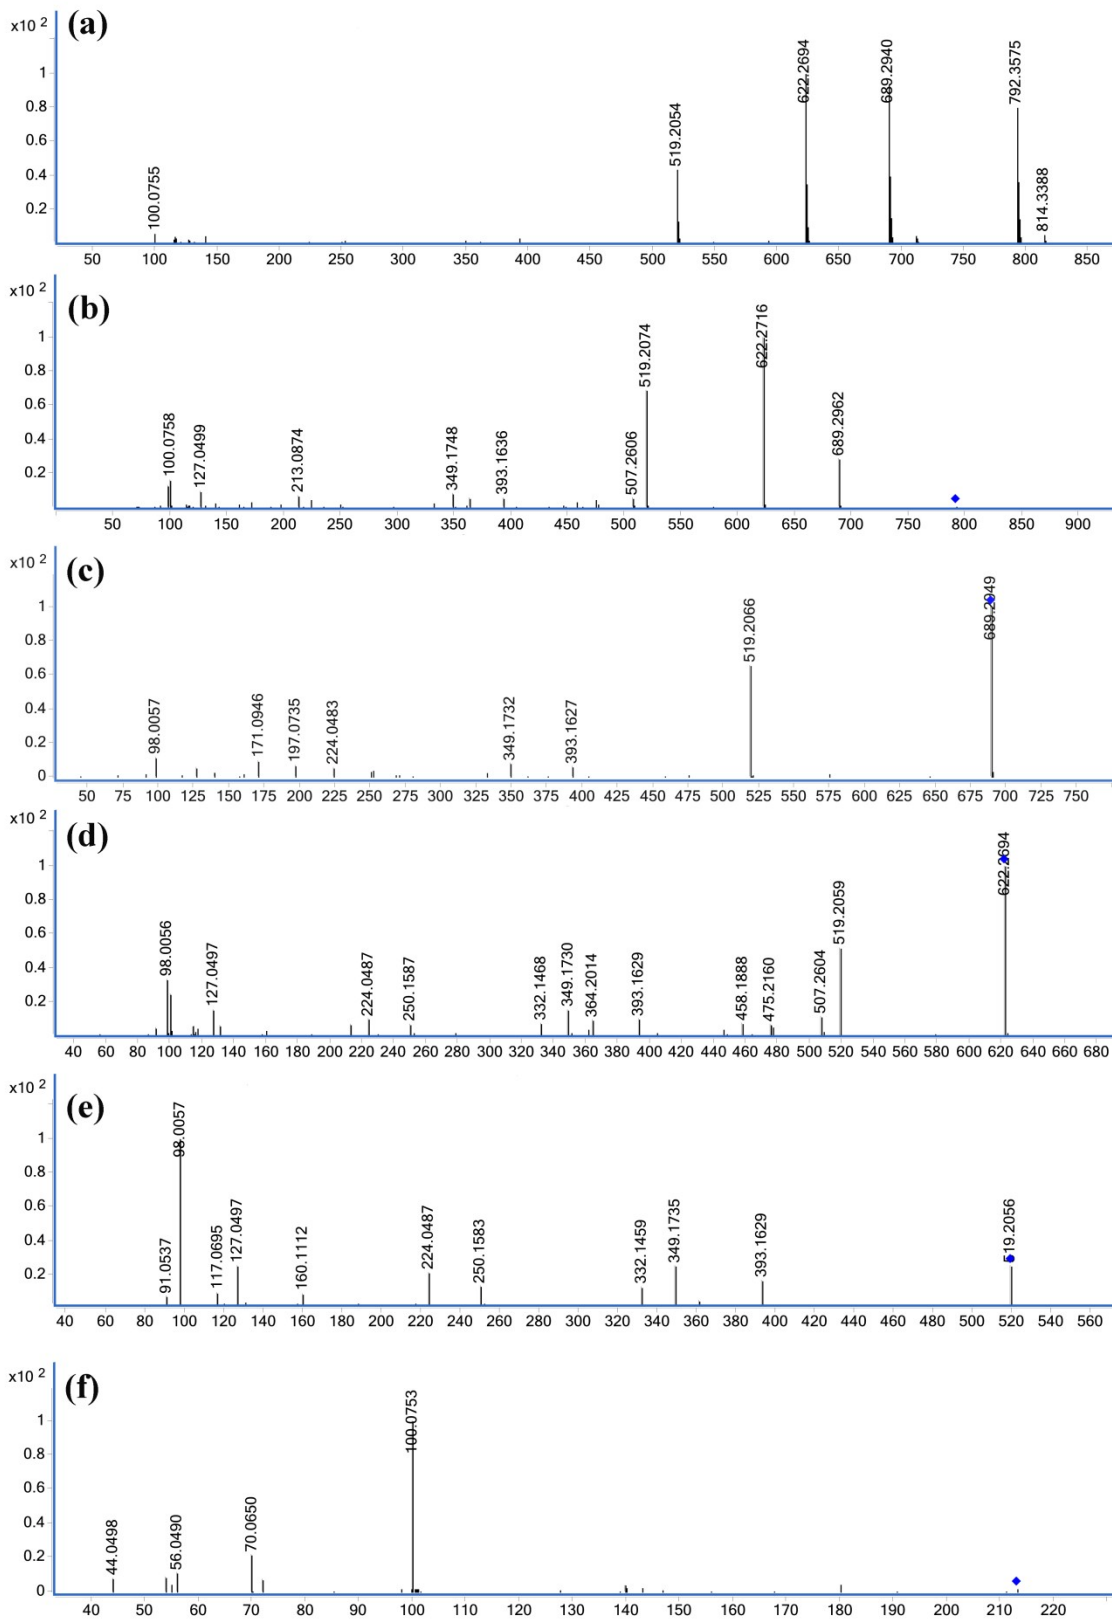

**Fig. S8.** (a) In-source fragmentation of C9 ( $m/z$  792), (b) MS/MS spectra of  $[M+H]^+$  ion of C9, (c) MS/MS spectra of  $[M+H]^+$  ion of  $m/z$  689, (d) MS/MS spectra of  $[M+H]^+$  ion of  $m/z$  622, (e) MS/MS spectra of  $[M+H]^+$  ion of  $m/z$  519, (f) MS/MS spectra of  $[M+H]^+$  ion of  $m/z$  213

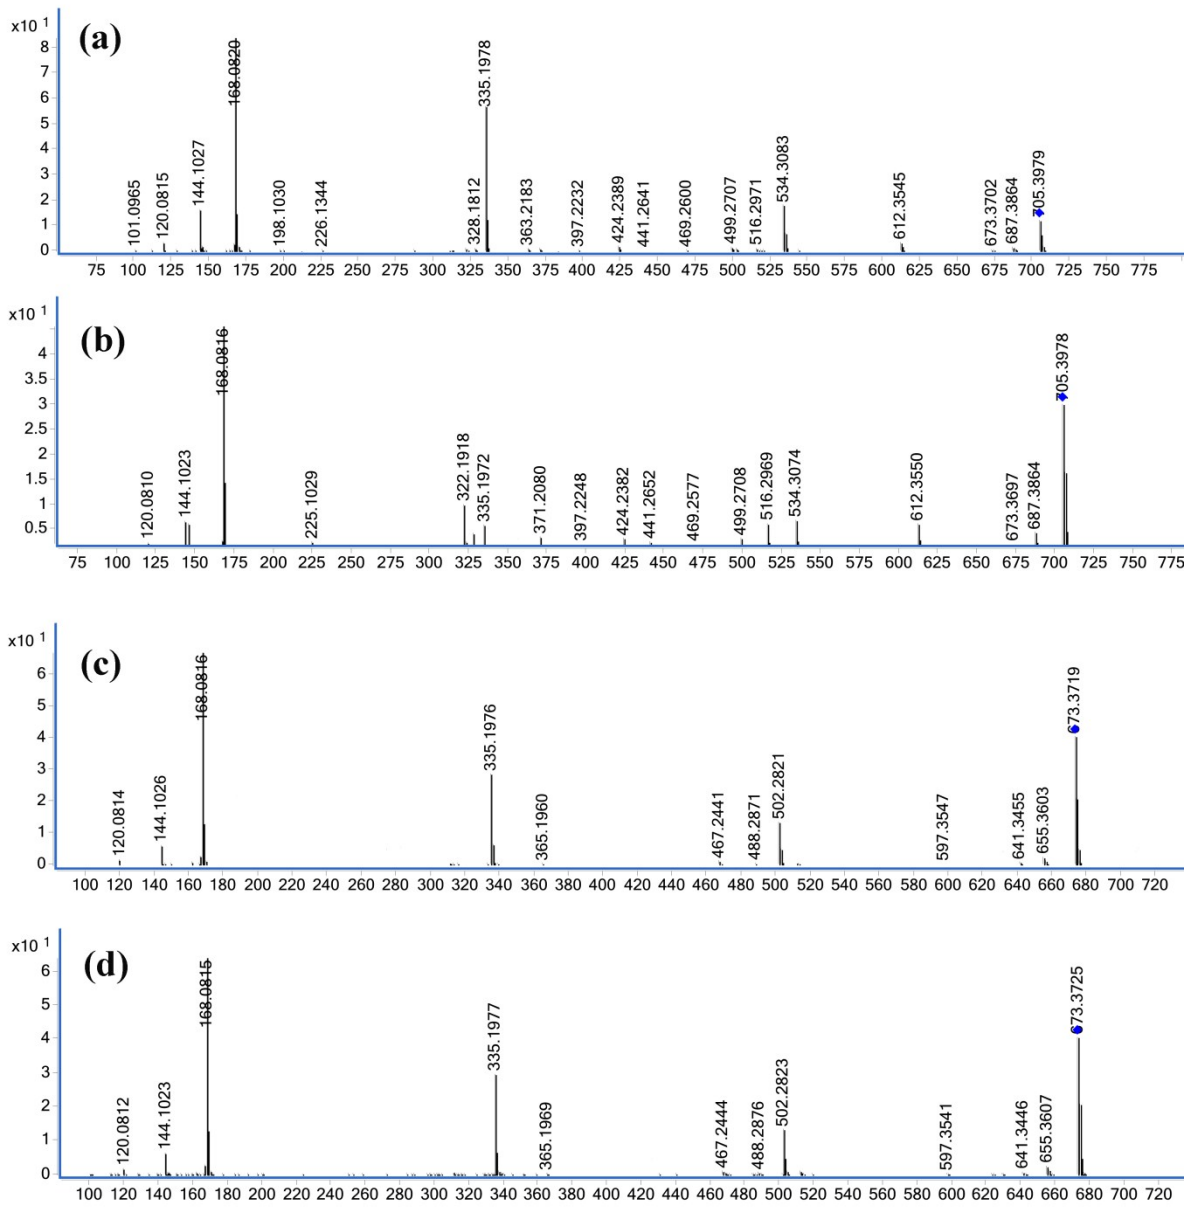

**Fig. S9.** LC/MS/MS spectra (Count (%) vs. mass-to-charge ( $m/z$ )) of the  $[M+H]^+$  ions of (a) ATZ, (b) A1, (c) A2, and (d) A3

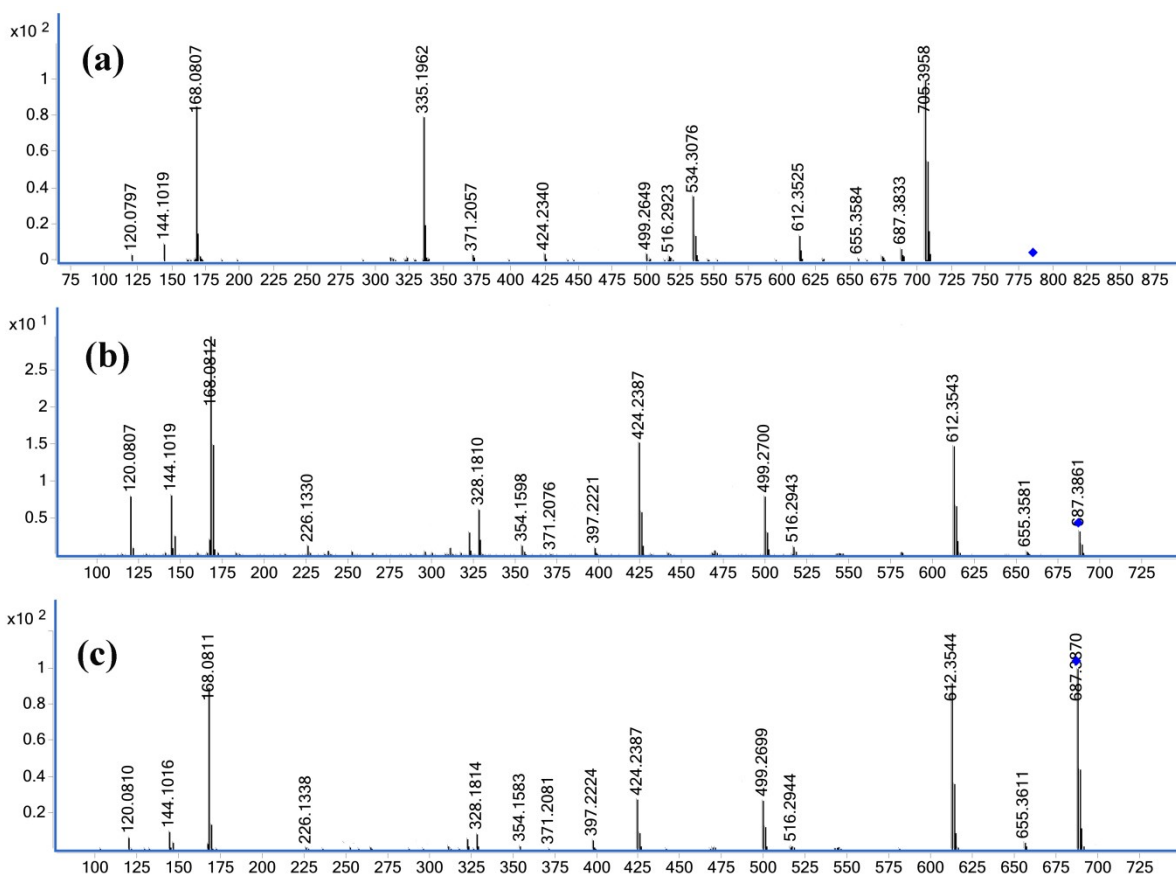

**Fig. S10.** LC/MS/MS spectra (Count (%) vs. mass-to-charge ( $m/z$ )) of the  $[M+H]^+$  ions of (a) A4, (b) A5, and (c) A6

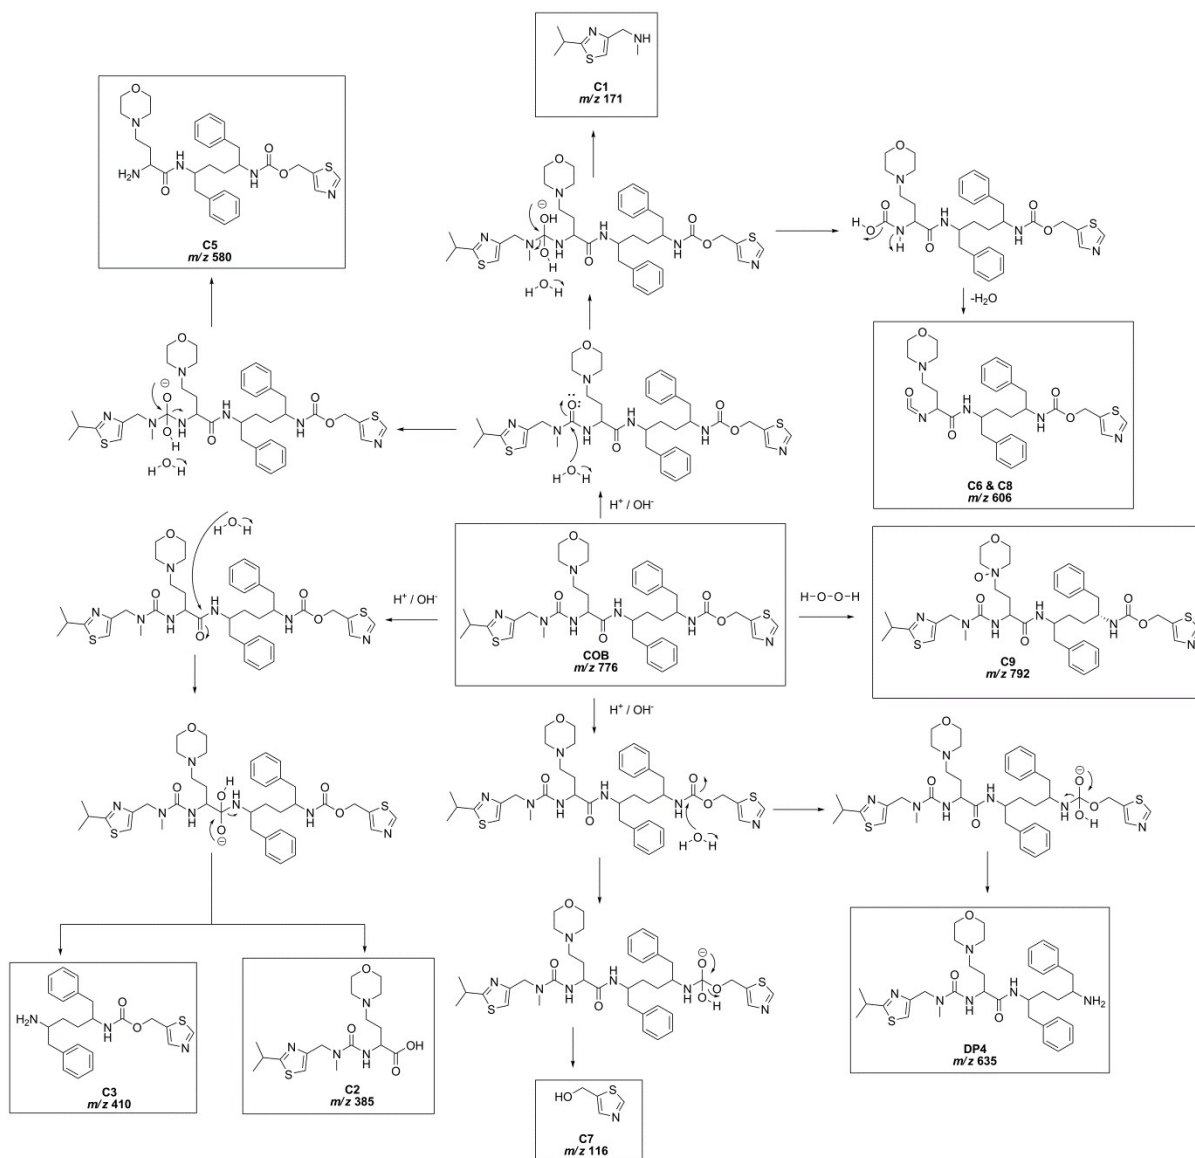

**Scheme S1.** Probable mechanisms of the formation of C1-C9

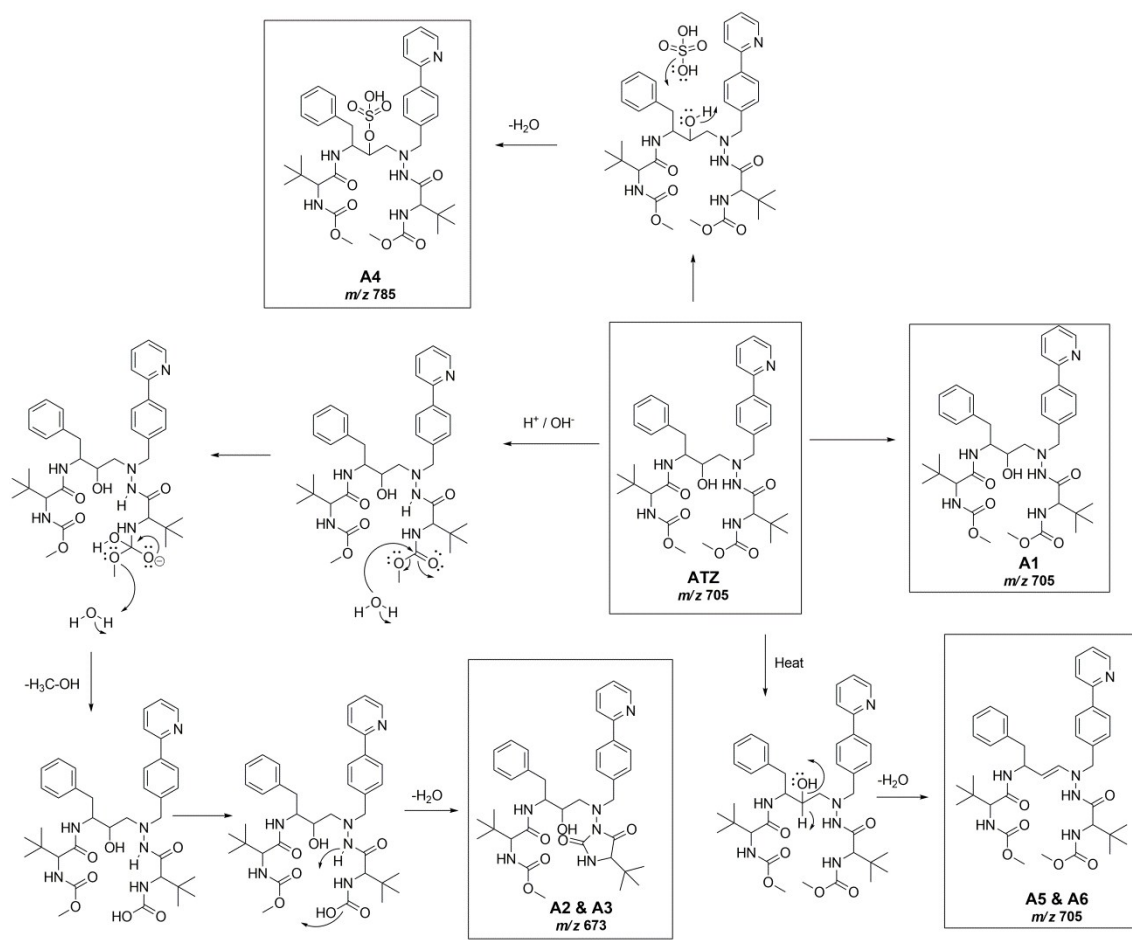

**Scheme S2.** Probable mechanisms of the formation of A1-A6

**Table S1** Data of trials carried out to separate the critical pair (A2 & A3) of ATZ

| Fig No | Column            | Mobile phase                |                                                   | USP Resolution between the A2&A3 |
|--------|-------------------|-----------------------------|---------------------------------------------------|----------------------------------|
|        |                   | Aqueous phase (A)           | Organic phase (B)                                 |                                  |
| S1a    | BEH C18           | 10mM Ammonium acetate       | Acetonitrile                                      | 1.10                             |
| S1b    | BEH C18           | 10mM Ammonium acetate       | Acetonitrile: methanol (70: 30, %v/v)             | 1.25                             |
| S1c    | BEH C18           | 10mM Ammonium acetate, pH 4 | Acetonitrile: methanol (70: 30, %v/v)             | 1.35                             |
| S1d    | BEH C18           | 10mM Ammonium acetate, pH 5 | Acetonitrile: methanol (70: 30, %v/v)             | 1.19                             |
| S1e    | CSH C18           | 10mM Ammonium acetate       | Acetonitrile                                      | 1.26                             |
| S1f    | CSH C18           | 10mM Ammonium acetate       | Acetonitrile: methanol (70: 30, %v/v)             | 1.24                             |
| S1g    | HSS Cyano         | 10mM Ammonium acetate       | Acetonitrile: methanol (70: 30, %v/v)             | Merged peaks- no separation      |
| S1h    | CSH Flouro phenyl | 10mM Ammonium acetate       | Acetonitrile: methanol (50: 50, %v/v) + 10% water | 1.11                             |
| S1i    | CSH phenyl hexyl  | 10mM Ammonium acetate       | Acetonitrile                                      | 1.11                             |
| S1j    | CSH phenyl hexyl  | 10mM Ammonium acetate       | Acetonitrile: methanol (70: 30, %v/v)             | 1.09                             |
| S1k    | CSH phenyl hexyl  | 0.1% Trifloro acetic acid   | Acetonitrile: methanol (80: 20, %v/v)             | 1.34                             |
| S1l    | CSH phenyl hexyl  | 0.1% Formic acid            | Acetonitrile: methanol (80: 20, %v/v)             | 1.70                             |

**Table S2**

High resolution mass spectrometry data of all fragment ions of drug and its DPs

| Name of drug/DP | Molecular Formula         | Theoretical mass  | Observed mass | Error ppm |       |
|-----------------|---------------------------|-------------------|---------------|-----------|-------|
| <b>COB</b>      | $C_{40}H_{54}N_7O_5S_2^+$ | 776.3622          | 776.3629      | -0.90     |       |
|                 | $C_{36}H_{45}N_6O_4S_2^+$ | 689.2938          | 689.2928      | 1.45      |       |
|                 | $C_{32}H_{40}N_5O_5S^+$   | 606.2745          | 606.2746      | -0.16     |       |
|                 | $C_{31}H_{40}N_5O_3S^+$   | 562.2846          | 562.2845      | 0.18      |       |
|                 | $C_{31}H_{37}N_4O_3S^+$   | 545.2581          | 545.2579      | 0.37      |       |
|                 | $C_{28}H_{31}N_4O_4S^+$   | 519.2061          | 519.2059      | 0.39      |       |
|                 | $C_{28}H_{35}N_4O_4^+$    | 491.2653          | 491.2651      | 0.41      |       |
|                 | $C_{27}H_{35}N_4O_3^+$    | 463.2704          | 463.2699      | 1.08      |       |
|                 | $C_{27}H_{34}N_3O_3^+$    | 448.2595          | 448.2592      | 0.67      |       |
|                 | $C_{23}H_{25}N_2O_2^+$    | 361.1911          | 361.191       | 0.28      |       |
|                 | $C_9H_{16}N_3O_3^+$       | 214.1186          | 214.1182      | 1.87      |       |
|                 | $C_9H_{13}N_2O_3^+$       | 197.0921          | 197.0916      | 2.54      |       |
|                 | $C_8H_{15}N_2S^+$         | 171.095           | 171.0948      | 1.17      |       |
|                 | $C_5H_7N_2O_2^+$          | 127.0502          | 127.0498      | 3.15      |       |
|                 | $C_4H_4NS^+$              | 98.0059           | 98.006        | -1.02     |       |
|                 | <b>C1</b>                 | $C_8H_{15}N_2S^+$ | 171.095       | 171.0951  | -0.58 |
|                 |                           | $C_7H_{10}NS^+$   | 140.0528      | 140.0526  | 1.43  |
| $C_5H_6NS^+$    |                           | 112.0215          | 112.0229      | -12.50    |       |
| $C_3H_3S^+$     |                           | 70.995            | 70.9951       | -1.41     |       |
| $C_2H_3S^+$     |                           | 58.995            | 58.9947       | 5.09      |       |
| $C_3H_4N^+$     |                           | 54.0338           | 54.0332       | 11.10     |       |
| <b>C2</b>       | $C_{17}H_{29}N_4O_4S^+$   | 385.1904          | 385.1912      | -2.08     |       |
|                 | $C_{13}H_{20}N_3O_3S^+$   | 298.122           | 298.1214      | 2.01      |       |
|                 | $C_9H_{15}N_2O_4^+$       | 215.1026          | 215.1027      | -0.46     |       |
|                 | $C_9H_{13}N_2O_3^+$       | 197.0921          | 197.0907      | 7.10      |       |
|                 | $C_8H_{15}N_2S^+$         | 171.095           | 171.095       | 0.00      |       |
|                 | $C_7H_{10}NS^+$           | 140.0528          | 140.0527      | 0.71      |       |
|                 | $C_5H_6NO_3^+$            | 128.0342          | 128.0343      | -0.78     |       |
|                 | $C_5H_{10}NO^+$           | 100.0757          | 100.0758      | -1.00     |       |
|                 | $C_4H_{10}NO^+$           | 88.0757           | 88.0759       | -2.27     |       |
|                 | $C_3H_6N^+$               | 56.0495           | 56.0498       | -5.35     |       |
| <b>C3</b>       | $C_{23}H_{28}N_3O_2S^+$   | 410.1897          | 410.1899      | -0.49     |       |
|                 | $C_{23}H_{25}N_2O_2S^+$   | 393.1631          | 393.1638      | -1.78     |       |
|                 | $C_{22}H_{25}N_2S^+$      | 349.1733          | 349.1734      | -0.29     |       |
|                 | $C_{22}H_{22}NS^+$        | 332.1467          | 332.1467      | 0.00      |       |
|                 | $C_{18}H_{22}N^+$         | 252.1747          | 252.1749      | -0.79     |       |
|                 | $C_{11}H_{14}N^+$         | 160.1121          | 160.1121      | 0.00      |       |
|                 | $C_{10}H_{11}^+$          | 131.0855          | 131.0858      | -2.29     |       |
|                 | $C_9H_9^+$                | 117.0699          | 117.0702      | -2.56     |       |
|                 | $C_4H_4NS^+$              | 98.0059           | 98.0063       | -4.08     |       |
|                 | $C_7H_7^+$                | 91.0542           | 91.0547       | -5.49     |       |

|              |                           |               |          |          |
|--------------|---------------------------|---------------|----------|----------|
| <b>C4</b>    | $C_{35}H_{51}N_6O_3S^+$   | 635.3738      | 635.3728 | 1.57     |
|              | $C_{27}H_{37}N_4O_3^+$    | 465.286       | 465.2855 | 1.07     |
|              | $C_{27}H_{34}N_3O_3^+$    | 448.2595      | 448.2597 | -0.45    |
|              | $C_{23}H_{28}N_3O_2^+$    | 378.2176      | 378.2175 | 0.26     |
|              | $C_{23}H_{25}N_2O_2^+$    | 361.1911      | 361.1936 | -6.92    |
|              | $C_{18}H_{22}N^+$         | 252.1747      | 252.1725 | 8.72     |
|              | $C_9H_{16}N_3O_3^+$       | 214.1186      | 214.1193 | -3.27    |
|              | $C_9H_{13}N_2O_3^+$       | 197.0921      | 197.0916 | 2.54     |
|              | $C_8H_{15}N_2S^+$         | 171.095       | 171.0944 | 3.51     |
|              | $C_5H_7N_2O_2^+$          | 127.0502      | 127.0509 | -5.51    |
|              | $C_5H_{10}NO^+$           | 100.0754      | 100.0754 | 0.00     |
|              |                           |               |          |          |
| <b>C5</b>    | $C_{31}H_{42}N_5O_4S^+$   | 580.2952      | 580.2949 | 0.52     |
|              | $C_{27}H_{33}N_4O_3S^+$   | 493.2268      | 493.2274 | -1.22    |
|              | $C_{23}H_{25}N_2O_2S^+$   | 393.1631      | 393.1652 | -5.34    |
|              | $C_{23}H_{28}N_3O_2^+$    | 378.2176      | 378.2157 | 5.02     |
|              | $C_{22}H_{25}N_2S^+$      | 349.1733      | 349.1728 | 1.43     |
|              | $C_{22}H_{22}NS^+$        | 332.1467      | 332.1473 | -1.81    |
|              | $C_{18}H_{22}N^+$         | 252.1747      | 252.1751 | -1.59    |
|              | $C_8H_{12}N_3OS^+$        | 198.0696      | 198.0698 | -1.01    |
|              | $C_8H_{15}N_2O_2^+$       | 171.1128      | 171.1125 | 1.75     |
|              | $C_{11}H_{14}N^+$         | 160.1121      | 160.1115 | 3.75     |
|              | $C_{10}H_{11}^+$          | 131.0855      | 131.0861 | -4.58    |
|              | $C_9H_9^+$                | 117.0699      | 117.0698 | 0.85     |
|              | $C_5H_{10}NO^+$           | 100.0757      | 100.0755 | 2.00     |
|              | $C_7H_7^+$                | 91.0542       | 91.0551  | -9.88    |
|              |                           |               |          |          |
| <b>C6</b>    | $C_{32}H_{40}N_5O_5S^+$   | 606.2745      | 606.275  | -0.82    |
|              | $C_{31}H_{40}N_5O_3S^+$   | 562.2846      | 562.2846 | 0.00     |
|              | $C_{31}H_{37}N_4O_3S^+$   | 545.2581      | 545.2583 | -0.37    |
|              | $C_{28}H_{35}N_4O_4^+$    | 491.2653      | 491.2657 | -0.81    |
|              | $C_{27}H_{35}N_4O_3^+$    | 463.2704      | 463.2712 | -1.73    |
|              | $C_{27}H_{34}N_3O_3^+$    | 448.2595      | 448.2599 | -0.89    |
|              | $C_{23}H_{25}N_2O_2^+$    | 361.1911      | 361.1917 | -1.66    |
|              | $C_{22}H_{22}NS^+$        | 332.1467      | 332.1474 | -2.11    |
|              | $C_9H_{16}N_3O_3^+$       | 214.1186      | 214.119  | -1.87    |
|              | $C_9H_{13}N_2O_3^+$       | 197.0921      | 197.0925 | -2.03    |
|              | $C_5H_7N_2O_2^+$          | 127.0502      | 127.0503 | -0.79    |
|              | $C_4H_4NS^+$              | 98.0059       | 98.0065  | -6.12    |
|              |                           |               |          |          |
|              | <b>C7</b>                 | $C_4H_6NOS^+$ | 116.0165 | 116.0174 |
| $C_3H_5OS^+$ |                           | 89.0056       | 89.0055  | 1.12     |
| $C_3H_4NS^+$ |                           | 86.0059       | 86.0058  | 1.16     |
| $C_3H_3S^+$  |                           | 70.995        | 70.9948  | 2.82     |
| $C_2H_3S^+$  |                           | 58.995        | 58.9948  | 3.39     |
|              |                           |               |          |          |
| <b>C9</b>    | $C_{40}H_{54}N_7O_6S_2^+$ | 792.3572      | 792.3575 | -0.38    |
|              | $C_{36}H_{45}N_6O_4S_2^+$ | 689.2938      | 689.2962 | -3.48    |



|            |                         |          |          |       |
|------------|-------------------------|----------|----------|-------|
|            | $C_{32}H_{40}N_5O_6S^+$ | 622.2694 | 622.2716 | -3.54 |
|            | $C_{28}H_{31}N_4O_4S^+$ | 519.2061 | 519.2074 | -2.50 |
|            | $C_{28}H_{35}N_4O_5^+$  | 507.2602 | 507.2606 | -0.79 |
|            | $C_{23}H_{25}N_2O_2S^+$ | 393.1631 | 393.1636 | -1.27 |
|            | $C_{22}H_{25}N_2S^+$    | 349.1733 | 349.1748 | -4.30 |
|            | $C_9H_{13}N_2O_4^+$     | 213.087  | 213.0874 | -1.88 |
|            | $C_5H_7N_2O_2^+$        | 127.0502 | 127.0499 | 2.36  |
|            | $C_5H_{10}NO^+$         | 100.0757 | 100.0758 | -1.00 |
|            |                         |          |          |       |
| <b>ATZ</b> | $C_{38}H_{53}N_6O_7^+$  | 705.397  | 705.3978 | -1.13 |
|            | $C_{38}H_{51}N_6O_6^+$  | 687.3865 | 687.3863 | 0.29  |
|            | $C_{36}H_{46}N_5O_4^+$  | 612.3544 | 612.3544 | 0.00  |
|            | $C_{30}H_{40}N_5O_4^+$  | 534.3075 | 534.3082 | -1.31 |
|            | $C_{30}H_{38}N_5O_3^+$  | 516.2969 | 516.2971 | -0.39 |
|            | $C_{30}H_{35}N_4O_3^+$  | 499.2704 | 499.2706 | -0.40 |
|            | $C_{28}H_{33}N_4O^+$    | 441.2649 | 441.264  | 2.04  |
|            | $C_{28}H_{30}N_3O^+$    | 424.2383 | 424.2388 | -1.18 |
|            | $C_{22}H_{29}N_4O_3^+$  | 397.2234 | 397.2231 | 0.76  |
|            | $C_{20}H_{27}N_4O_3^+$  | 371.2078 | 371.2084 | -1.62 |
|            | $C_{18}H_{27}N_2O_4^+$  | 335.1965 | 335.1977 | -3.58 |
|            | $C_{20}H_{24}N_3O^+$    | 322.1914 | 322.1918 | -1.24 |
|            | $C_{12}H_{10}N^+$       | 168.0808 | 168.082  | -7.14 |
|            | $C_7H_{14}NO_2^+$       | 144.1019 | 144.1027 | -5.55 |
|            |                         |          |          |       |
| <b>A1</b>  | $C_{38}H_{53}N_6O_7^+$  | 705.397  | 705.3979 | -1.28 |
|            | $C_{38}H_{51}N_6O_6^+$  | 687.3865 | 687.3864 | 0.15  |
|            | $C_{36}H_{46}N_5O_4^+$  | 612.3544 | 612.355  | -0.98 |
|            | $C_{30}H_{40}N_5O_4^+$  | 534.3075 | 534.3075 | 0.00  |
|            | $C_{30}H_{38}N_5O_3^+$  | 516.2969 | 516.2969 | 0.00  |
|            | $C_{30}H_{35}N_4O_3^+$  | 499.2704 | 499.2709 | -1.00 |
|            | $C_{28}H_{33}N_4O^+$    | 441.2649 | 441.2653 | -0.91 |
|            | $C_{28}H_{30}N_3O^+$    | 424.2383 | 424.2383 | 0.00  |
|            | $C_{22}H_{29}N_4O_3^+$  | 397.2234 | 397.2249 | -3.78 |
|            | $C_{20}H_{27}N_4O_3^+$  | 371.2078 | 371.2081 | -0.81 |
|            | $C_{18}H_{27}N_2O_4^+$  | 335.1965 | 335.1972 | -2.09 |
|            | $C_{20}H_{24}N_3O^+$    | 322.1914 | 322.1918 | -1.24 |
|            | $C_{12}H_{10}N^+$       | 168.0808 | 168.0817 | -5.35 |
|            | $C_7H_{14}NO_2^+$       | 144.1019 | 144.1024 | -3.47 |
|            | $C_8H_{10}N^+$          | 120.0808 | 120.081  | -1.67 |
|            |                         |          |          |       |
| <b>A2</b>  | $C_{37}H_{49}N_6O_6^+$  | 673.3708 | 673.3719 | -1.63 |
|            | $C_{37}H_{47}N_6O_5^+$  | 655.3602 | 655.3603 | -0.15 |
|            | $C_{36}H_{45}N_6O_5^+$  | 641.3446 | 641.3455 | -1.40 |
|            | $C_{35}H_{45}N_6O_3^+$  | 597.3548 | 597.3547 | 0.17  |
|            | $C_{29}H_{36}N_5O_3^+$  | 502.2813 | 502.2821 | -1.59 |
|            | $C_{25}H_{38}N_5O_5^+$  | 488.2867 | 488.2871 | -0.82 |
|            | $C_{29}H_{31}N_4O_2^+$  | 467.2442 | 467.2441 | 0.21  |
|            | $C_{21}H_{25}N_4O_2^+$  | 365.1972 | 365.196  | 3.29  |

|           |                            |          |          |       |
|-----------|----------------------------|----------|----------|-------|
|           | $C_{18}H_{27}N_2O_4^+$     | 335.1965 | 335.1976 | -3.28 |
|           | $C_{12}H_{10}N^+$          | 168.0808 | 168.0816 | -4.76 |
|           | $C_7H_{14}NO_2^+$          | 144.1019 | 144.1026 | -4.86 |
|           | $C_8H_{10}N^+$             | 120.0808 | 120.0814 | -5.00 |
|           |                            |          |          |       |
| <b>A3</b> | $C_{37}H_{49}N_6O_6^+$     | 673.3708 | 673.3725 | -2.52 |
|           | $C_{37}H_{47}N_6O_5^+$     | 655.3602 | 655.3607 | -0.76 |
|           | $C_{36}H_{45}N_6O_5^+$     | 641.3446 | 641.3446 | 0.00  |
|           | $C_{35}H_{45}N_6O_3^+$     | 597.3548 | 597.3541 | 1.17  |
|           | $C_{29}H_{36}N_5O_3^+$     | 502.2813 | 502.2823 | -1.99 |
|           | $C_{25}H_{38}N_5O_5^+$     | 488.2867 | 488.2876 | -1.84 |
|           | $C_{29}H_{31}N_4O_2^+$     | 467.2442 | 467.2444 | -0.43 |
|           | $C_{21}H_{25}N_4O_2^+$     | 365.1972 | 365.1969 | 0.82  |
|           | $C_{18}H_{27}N_2O_4^+$     | 335.1965 | 335.1977 | -3.58 |
|           | $C_{12}H_{10}N^+$          | 168.0808 | 168.0816 | -4.76 |
|           | $C_7H_{14}NO_2^+$          | 144.1019 | 144.1023 | -2.78 |
|           | $C_8H_{10}N^+$             | 120.0808 | 120.0812 | -3.33 |
|           |                            |          |          |       |
| <b>A4</b> | $C_{38}H_{53}N_6O_{10}S^+$ | 785.3538 | 785.3534 | 0.51  |
|           | $C_{38}H_{53}N_6O_7^+$     | 705.397  | 705.3958 | 1.70  |
|           | $C_{38}H_{51}N_6O_6^+$     | 687.3865 | 687.3833 | 4.66  |
|           | $C_{37}H_{47}N_6O_5^+$     | 655.3602 | 655.3584 | 2.75  |
|           | $C_{36}H_{46}N_5O_4^+$     | 612.3544 | 612.3525 | 3.10  |
|           | $C_{30}H_{40}N_5O_4^+$     | 534.3075 | 534.3076 | -0.19 |
|           | $C_{30}H_{38}N_5O_3^+$     | 516.2969 | 516.2923 | 8.91  |
|           | $C_{30}H_{35}N_4O_3^+$     | 499.2704 | 499.2649 | 11.02 |
|           | $C_{28}H_{30}N_3O^+$       | 424.2383 | 424.234  | 10.14 |
|           | $C_{20}H_{27}N_4O_3^+$     | 371.2078 | 371.2057 | 5.66  |
|           | $C_{18}H_{27}N_2O_4^+$     | 335.1965 | 335.1962 | 0.89  |
|           | $C_{12}H_{10}N^+$          | 168.0808 | 168.0807 | 0.59  |
|           | $C_7H_{14}NO_2^+$          | 144.1019 | 144.1019 | 0.00  |
|           | $C_8H_{10}N^+$             | 120.0808 | 120.0797 | 9.16  |
|           |                            |          |          |       |
| <b>A5</b> | $C_{38}H_{51}N_6O_6^+$     | 687.3865 | 687.3861 | 0.58  |
|           | $C_{37}H_{47}N_6O_5^+$     | 655.3602 | 655.3581 | 3.20  |
|           | $C_{36}H_{46}N_5O_4^+$     | 612.3544 | 612.3543 | 0.16  |
|           | $C_{30}H_{38}N_5O_3^+$     | 516.2969 | 516.2943 | 5.04  |
|           | $C_{30}H_{35}N_4O_3^+$     | 499.2704 | 499.27   | 0.80  |
|           | $C_{28}H_{30}N_3O^+$       | 424.2383 | 424.2387 | -0.94 |
|           | $C_{22}H_{29}N_4O_3^+$     | 397.2234 | 397.2221 | 3.27  |
|           | $C_{20}H_{27}N_4O_3^+$     | 371.2078 | 371.2076 | 0.54  |
|           | $C_{23}H_{20}N_3O^+$       | 354.1601 | 354.1598 | 0.85  |
|           | $C_{22}H_{22}N_3^+$        | 328.1808 | 328.181  | -0.61 |
|           | $C_{14}H_{16}N_3^+$        | 226.1339 | 226.133  | 3.98  |
|           | $C_{12}H_{10}N^+$          | 168.0808 | 168.0812 | -2.38 |
|           | $C_7H_{14}NO_2^+$          | 144.1019 | 144.1019 | 0.00  |
|           | $C_8H_{10}N^+$             | 120.0808 | 120.0807 | 0.83  |
|           |                            |          |          |       |

|           |                                                                            |          |          |       |
|-----------|----------------------------------------------------------------------------|----------|----------|-------|
| <b>A6</b> | C <sub>38</sub> H <sub>51</sub> N <sub>6</sub> O <sub>6</sub> <sup>+</sup> | 687.3865 | 687.387  | -0.73 |
|           | C <sub>37</sub> H <sub>47</sub> N <sub>6</sub> O <sub>5</sub> <sup>+</sup> | 655.3602 | 655.3611 | -1.37 |
|           | C <sub>36</sub> H <sub>46</sub> N <sub>5</sub> O <sub>4</sub> <sup>+</sup> | 612.3544 | 612.3544 | 0.00  |
|           | C <sub>30</sub> H <sub>38</sub> N <sub>5</sub> O <sub>3</sub> <sup>+</sup> | 516.2969 | 516.2944 | 4.84  |
|           | C <sub>30</sub> H <sub>35</sub> N <sub>4</sub> O <sub>3</sub> <sup>+</sup> | 499.2704 | 499.2699 | 1.00  |
|           | C <sub>28</sub> H <sub>30</sub> N <sub>3</sub> O <sup>+</sup>              | 424.2383 | 424.2387 | -0.94 |
|           | C <sub>22</sub> H <sub>29</sub> N <sub>4</sub> O <sub>3</sub> <sup>+</sup> | 397.2234 | 397.2224 | 2.52  |
|           | C <sub>20</sub> H <sub>27</sub> N <sub>4</sub> O <sub>3</sub> <sup>+</sup> | 371.2078 | 371.2081 | -0.81 |
|           | C <sub>23</sub> H <sub>20</sub> N <sub>3</sub> O <sup>+</sup>              | 354.1601 | 354.1583 | 5.08  |
|           | C <sub>22</sub> H <sub>22</sub> N <sub>3</sub> <sup>+</sup>                | 328.1808 | 328.1814 | -1.83 |
|           | C <sub>14</sub> H <sub>16</sub> N <sub>3</sub> <sup>+</sup>                | 226.1339 | 226.1338 | 0.44  |
|           | C <sub>12</sub> H <sub>10</sub> N <sup>+</sup>                             | 168.0808 | 168.0811 | -1.78 |
|           | C <sub>7</sub> H <sub>14</sub> NO <sub>2</sub> <sup>+</sup>                | 144.1019 | 144.1016 | 2.08  |
|           | C <sub>8</sub> H <sub>10</sub> N <sup>+</sup>                              | 120.0808 | 120.081  | -1.67 |

**Table S3**

Accuracy data of UPLC method for COB and ATZ

| Spiked concentration( $\mu\text{g}/\text{mL}$ ) | concentration found (in $\mu\text{g}/\text{mL}$ )<br>(mean $\pm$ SD; RSD) | Mean recovery (%) |
|-------------------------------------------------|---------------------------------------------------------------------------|-------------------|
| <b>COB</b>                                      |                                                                           |                   |
| 120 (at 80%)                                    | 119.96 $\pm$ 0.41;0.41                                                    | 99.97             |
| 150 (at 100%)                                   | 150.13 $\pm$ 0.10;0.10                                                    | 100.08            |
| 180 (at 120%)                                   | 180.17 $\pm$ 0.20;0.20                                                    | 100.09            |
| <b>ATZ</b>                                      |                                                                           |                   |
| 240 (at 80%)                                    | 240.37 $\pm$ 0.34;0.33                                                    | 100.15            |
| 300 (at 100%)                                   | 300.24 $\pm$ 0.13;0.13                                                    | 100.08            |
| 360 (at 120%)                                   | 359.97 $\pm$ 0.31;0.31                                                    | 99.99             |

**Table S4**

Precision data of UPLC method for COB and ATZ

| Concentration<br>( $\mu\text{g}/\text{mL}$ ) n = 6 | Method precision<br>Mean% Assay $\pm$<br>SD;%RSD | Intra-day precision<br>Mean% Assay $\pm$<br>SD;%RSD | Inter-day precision<br>Mean% Assay $\pm$<br>SD;%RSD |
|----------------------------------------------------|--------------------------------------------------|-----------------------------------------------------|-----------------------------------------------------|
| <b>COB</b>                                         |                                                  |                                                     |                                                     |
| 150                                                | 99.81 $\pm$ 0.57; 0.57                           | 99.83 $\pm$ 0.53; 0.53                              | 99.99 $\pm$ 0.34; 0.34                              |
| <b>ATZ</b>                                         |                                                  |                                                     |                                                     |

|     |                   |                   |                   |
|-----|-------------------|-------------------|-------------------|
| 300 | 99.97± 0.46; 0.46 | 99.96± 0.42; 0.42 | 99.81± 0.44; 0.44 |
|-----|-------------------|-------------------|-------------------|

**Table S5**

Robustness data of UPLC method for COB and ATZ

| Conditions                   | Variation of parameters | Tailing |      | Retention time (min) |       | % Assay |        |
|------------------------------|-------------------------|---------|------|----------------------|-------|---------|--------|
|                              |                         | COB     | ATZ  | COB                  | ATZ   | COB     | ATZ    |
| Flow rate (ml/min)           | 0.2                     | 1.72    | 1.59 | 10.50                | 11.58 | 98.12   | 98.54  |
|                              | 0.3                     | 1.72    | 1.45 | 9.26                 | 10.13 | 99.05   | 99.6   |
|                              | 0.4                     | 1.87    | 1.64 | 8.62                 | 9.36  | 100.4   | 100.2  |
| Column oven temperature (°C) | 25                      | 1.69    | 1.56 | 9.22                 | 10.05 | 98.09   | 98.12  |
|                              | 30                      | 1.70    | 1.49 | 9.22                 | 10.09 | 99.4    | 99.6   |
|                              | 35                      | 1.69    | 1.50 | 9.13                 | 10.03 | 100.06  | 100.12 |
| Wavelength (nm)              | 243                     | 1.68    | 1.45 | 9.26                 | 10.13 | 98.01   | 100.06 |
|                              | 245                     | 1.66    | 1.44 | 9.26                 | 10.13 | 99.23   | 100.15 |
|                              | 247                     | 1.66    | 1.45 | 9.26                 | 10.13 | 99.67   | 100.19 |
